# Supplementary material for: Endoscopic ultrasound-guided gastroenterostomy with lumen-apposing metal stent: an animal study comparison of wireless and over-the-wire techniques
Source: Research Square preprint supplement (doi:10.21203/rs.3.rs-6287871/v1), 2025-05-21

**Supplementary materials:**

**Figure 1s**: **Manual measurement of the anastomotic tensile strength and breaking point.**


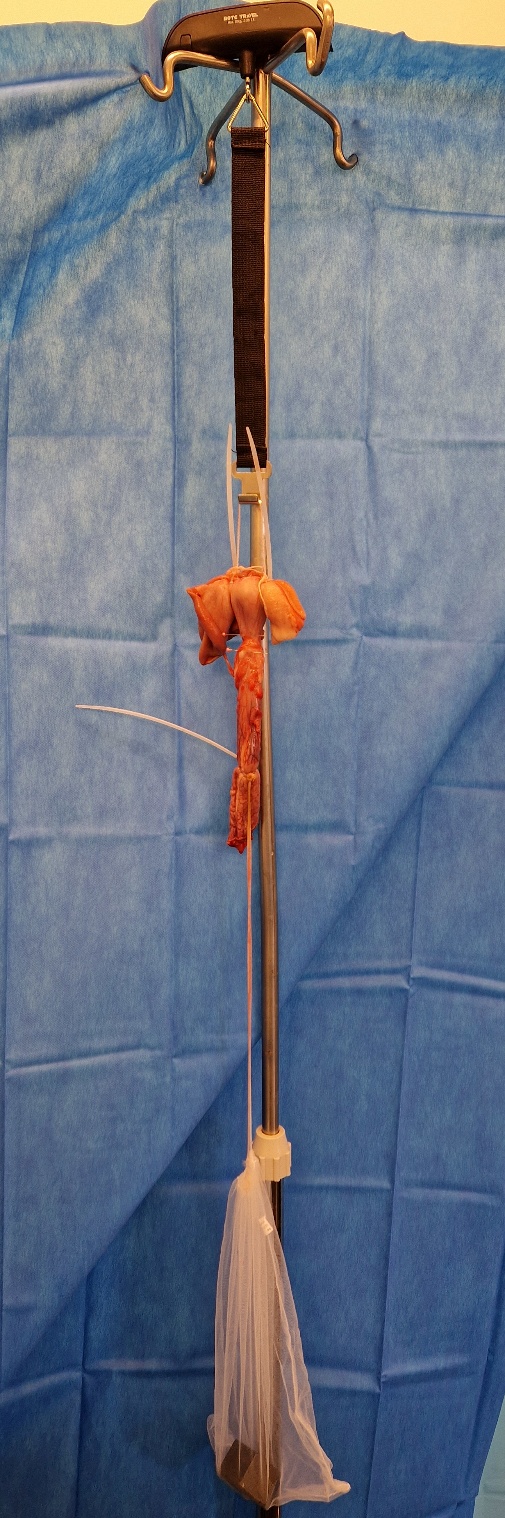
The anastomosis was mounted in a vertical position, the gastric segment at the top and the jejunal segment at the bottom. A net was mounted on to the jejunal segment of the anastomosis. Weights were progressively added to the net in order to increase the stretching force on the anastomosis, starting with a weight of 500g (4.9 N). The anastomotic tensile strength was tested by progressively applying traction force by adding 50g (0.45 N) every two minutes until rupture of the anastomotic tissue.

**Figure 2s : Efron’s enhanced bootstrap method with 80 random replication**

|  | DTOG | WEST |
| --- | --- | --- |
| Percent frequency IC 95% | [0.1818 ;0.6818] | [0.3182 ; 0.8182] |
| Bias | -0.0023 | 0.0023 |

**Figure 3s:** **Image of the two LAMS impact each other after the LAMS-in-LAMS technique without interposition tissue**


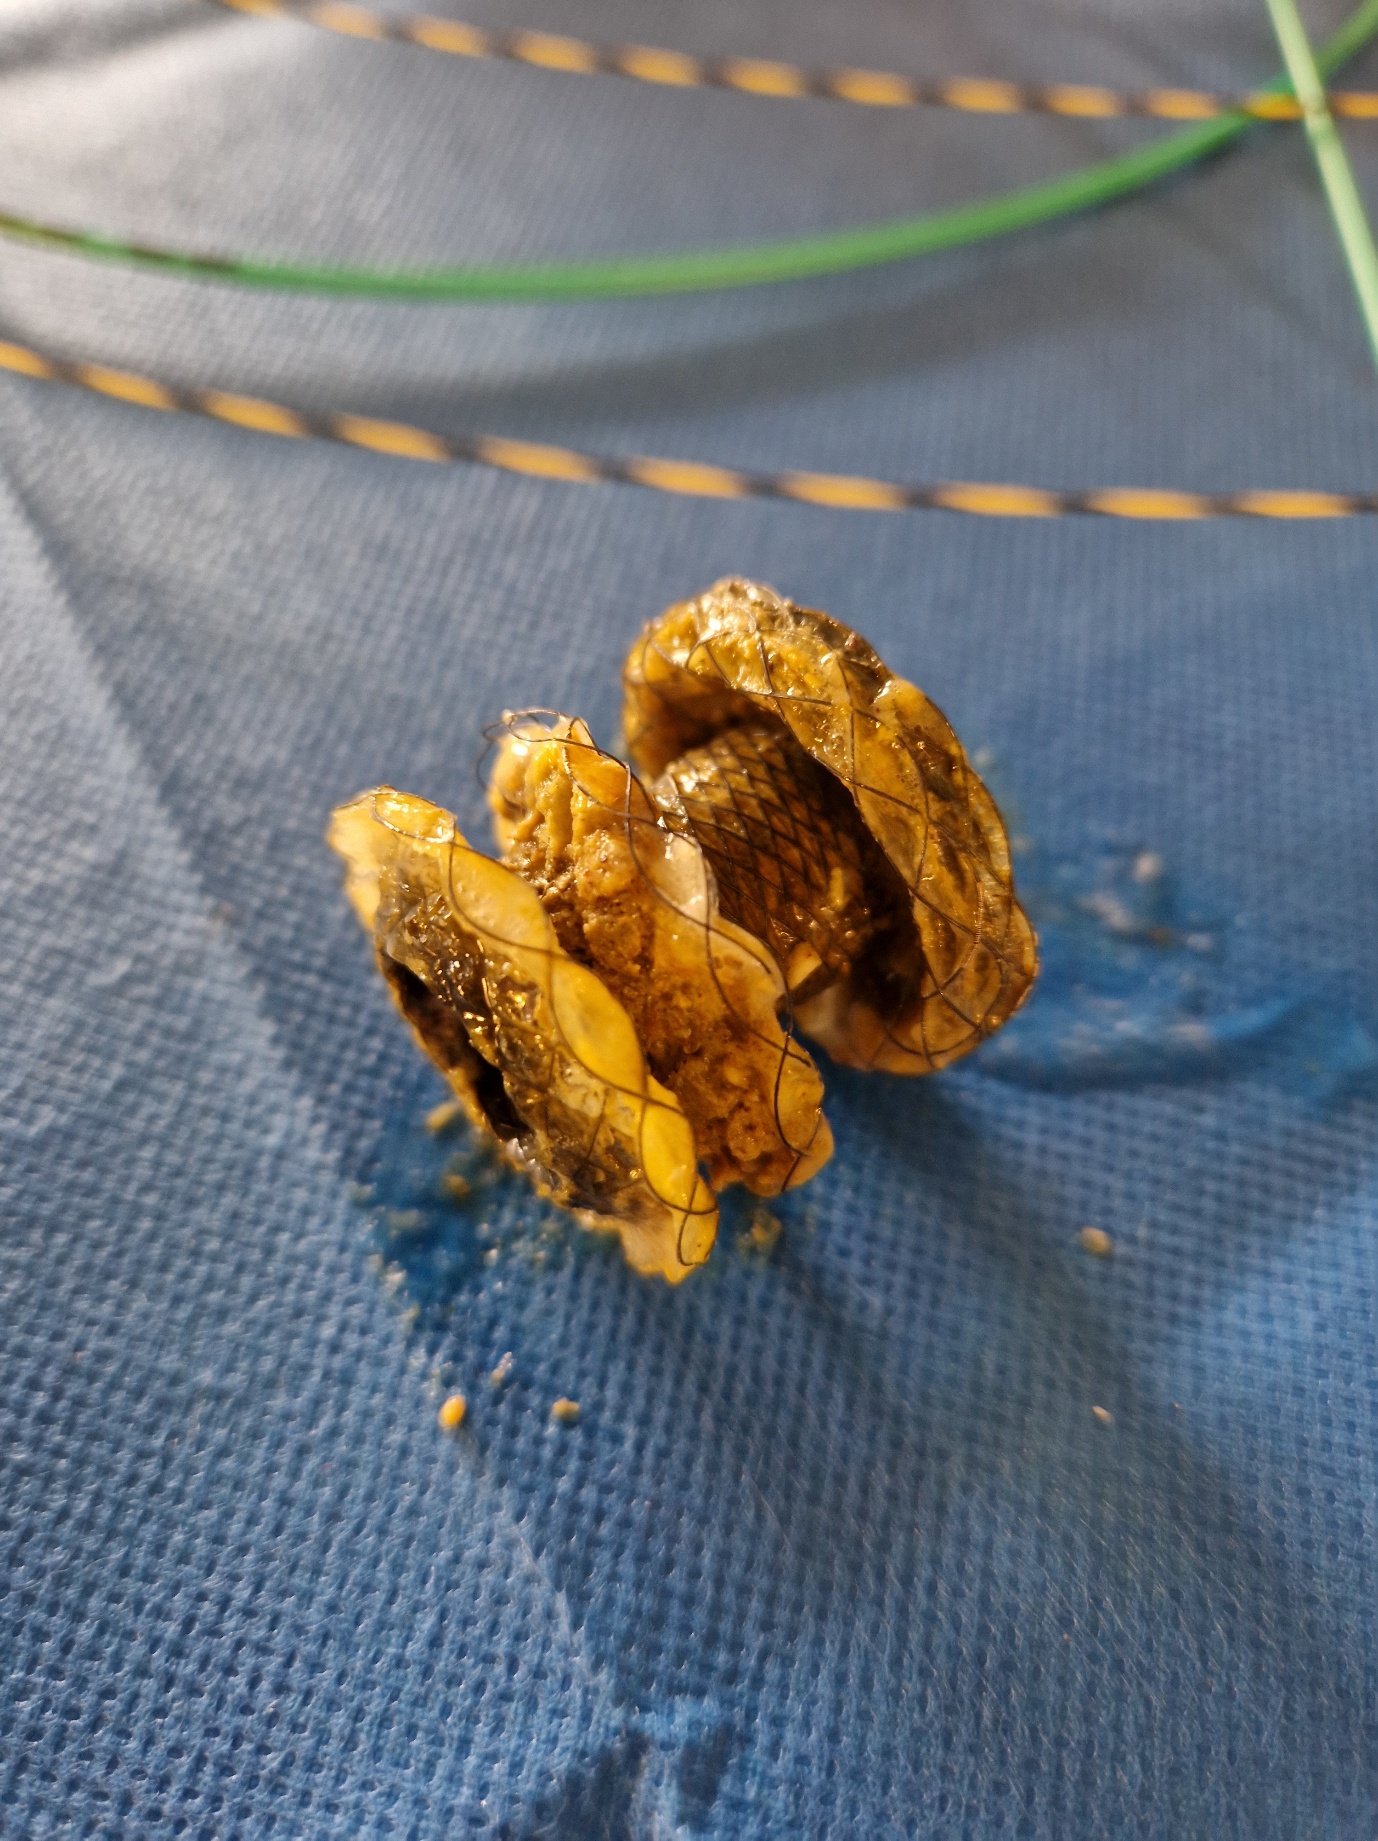


**Figure 4s**: **Microscopic view after Hematoxylin Eosin stain of the gastro-jejunal anastomosis. (+: jejunal tissue , *: gastric tissue , &: fibrotic tissue)**


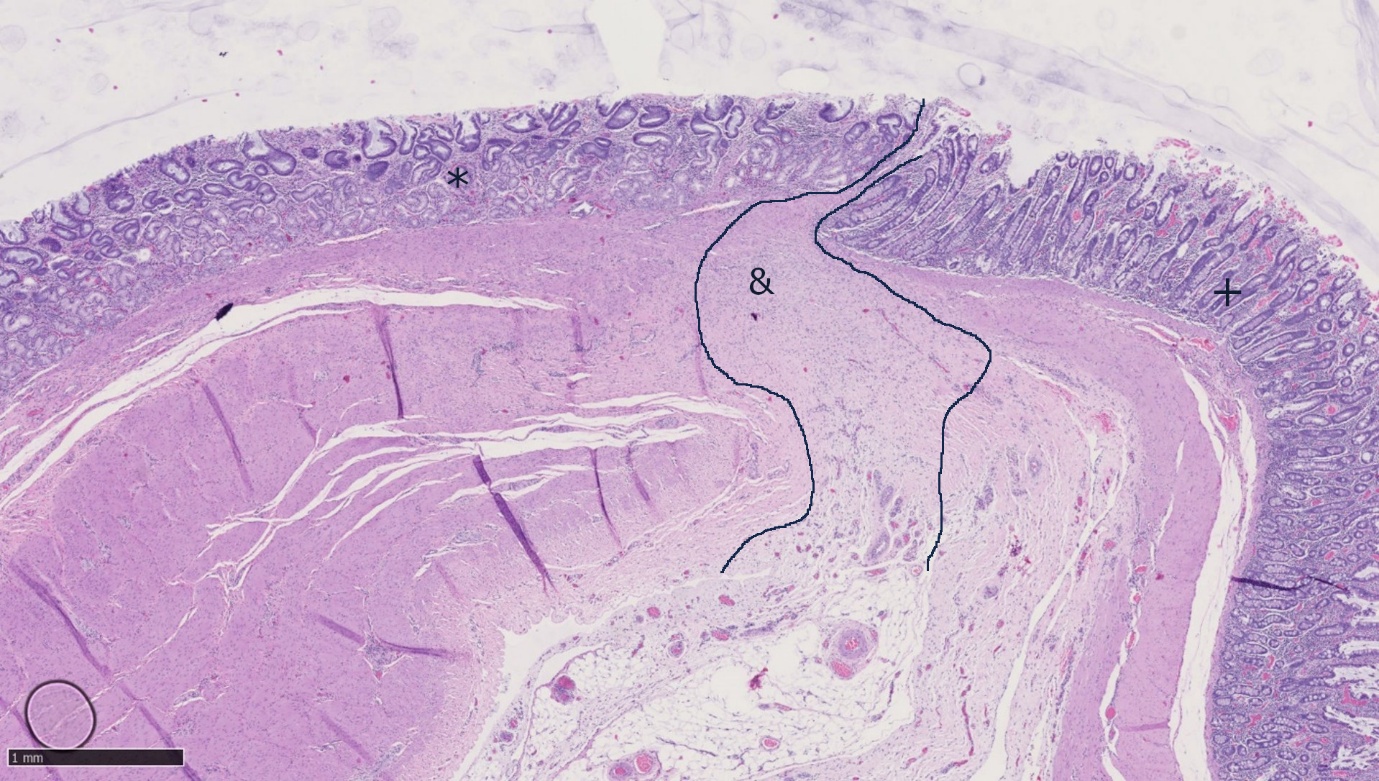

Supplement: Supplementary file 1 [file 1b0ab82a933daa23685d6349.docx]
